# Supplementary material for: Facile hydrothermal synthesis of CuO–Cu2O/GO nanocomposites for the photocatalytic degradation of organic dye and tetracycline pollutants
Source: Royal Society of Chemistry journal article supplement (doi:10.1039/d0nj00577k), 2020-01-01
Supplement: d0nj00577k1.pdf [file d0nj00577k1.pdf]

Supplemental Material for:

## Facile hydrothermal synthesis CuO-Cu<sub>2</sub>O/GO nanocomposite for photocatalytic degradation of organic dyes and tetracycline pollutants

Zhuanfang Zhang,<sup>\*a</sup> Li Sun,<sup>a</sup> Zhaojun Wu,<sup>a</sup> Yongzhi Liu,<sup>a</sup> and Shaobin Li<sup>\*b</sup>

<sup>a</sup>Center of Teaching Experiment Management Equipment, Qiqihar University, Qiqihar, 161006, China.

<sup>b</sup>College of Materials Science and Engineering, Qiqihar University, Qiqihar 161006, China.

Fax: 86-0452-2738750; Tel: 86-0452-2738750; E-mail: zzfhao2014@163.com, qqhrslsb1022@126.com.

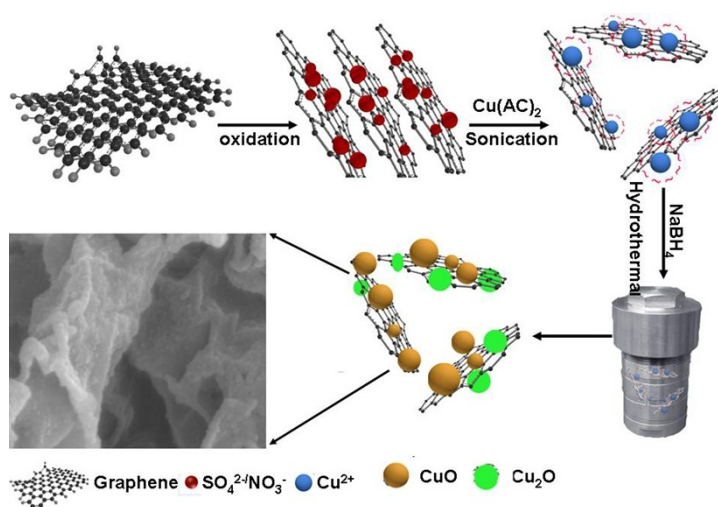

**Scheme S1.** Schematic illustration of the formation mechanism of the CuO-Cu<sub>2</sub>O/GO composite

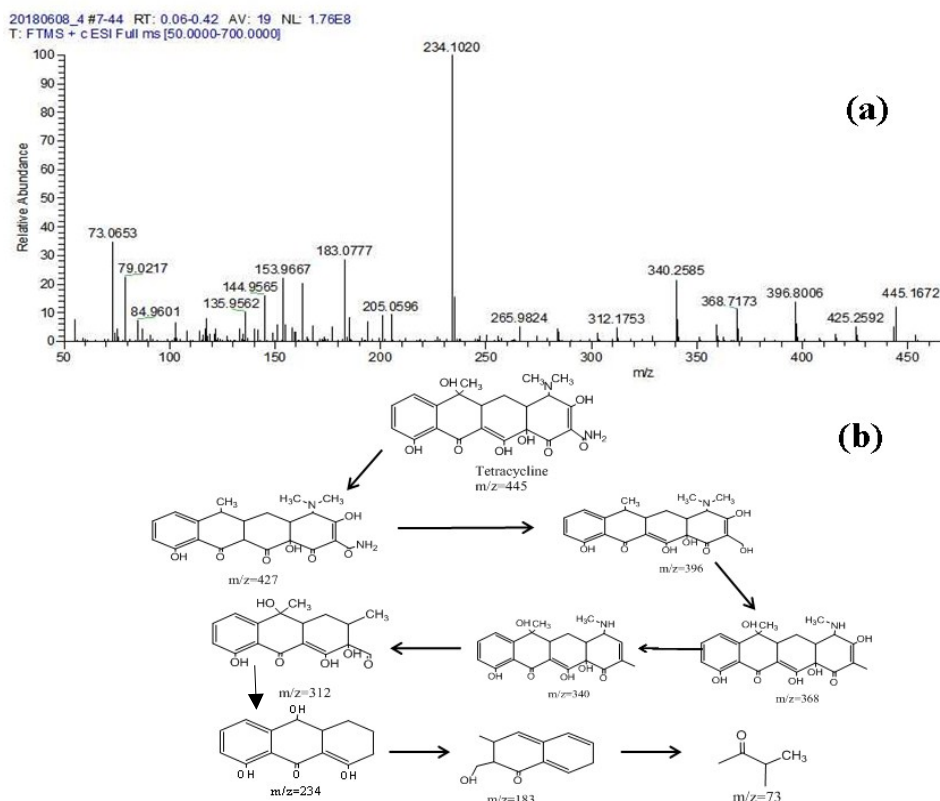

**Fig. S1.** (a) m/z of degraded TC in 120 min visible-light irradiation, (b) The proposed main intermediates of photodegradation of TC irradiation by visible light for 120 min.

**Table S1.** Comparison of heterostructures photocatalytic degradation of target pollutants under the visible light.

| Heterostructure Materials              | target pollutants | Ref       |
|----------------------------------------|-------------------|-----------|
| ZnS:Mn/MWCNTs                          | MB                | 1         |
| Ag/BiPO <sub>4</sub>                   | MB                | 2         |
| CuO/BiFeO <sub>3</sub>                 | MO                | 3         |
| CuO/ZnO                                | MB                | 4         |
| Nd <sub>2</sub> O <sub>3</sub> /ZnO-GO | MB                | 5         |
| BiFeWO <sub>6</sub> /MoS <sub>2</sub>  | MB                | 6         |
| CuO /TiO <sub>2</sub>                  | MB/4-Nitrophenol  | 7         |
| ZnO/CuO/GO                             | RhB               | 8         |
| Ag/ZnO                                 | RhB               | 9         |
| CdO-Graphene                           | MB/ MO/ RhB       | 10        |
| CuO-Cu <sub>2</sub> O/GO               | Tetracycline/MO   | This work |

**Annotations:** MB= Methylene Blue; MO= Methylene Orange; RhB= Rhodamine B

1 A. S. Leil, M. A. Naeimibc, Abbas Rajabi Abharia Maedeh Vafaeed Goma A.M.Alief, *J Environ. Manage.*, 2019, **247**, 62.

2 Y. N. Zhang, H. Q. Fan, M. M. Li and H. L. Tian, *Dalton Trans.*, 2013, **42**, 13172.

- 3 F. Niu, D. Chen, L. S. Qin, N. Zhang, J. Y. Wang, Z. Chen, and Y. X. Huang, *ChemCatChem*, 2015, **7**, 3279.
- 4 M. C. Oliveira , V. S. Fonseca , N. F. Andrade Neto, R. A. P. Ribeiro, E. Longo, S. R. deLazaro, F. V. Motta, M. R. D. Bomio, *Ceram. Inter.*, 10.1016/j.ceramint. 2019, **12**, 205
- 5 A. Sharifi, L. Montazerghaem , A. Naeimi , A.R.Abhari ,M. Vafae, A.M. Alie,f , H. Sadegh, *J Environ. Manage.*, 2019, **567**, 213.
- 6 R. A.Senthil, S. Osmana, J. Pana, Y. Z. Suna,T. R. , A.Manikandan, 2019, **45**, 18683.
- 7 B. Çinar, I. K.\_oglu, B. Tuonbül, A. Demirbüken, S.Dursun, I. C. Kaya, V. Kalem, H. Akyildiz, *Mat. Sci. Semicon. Proc.*, 2020, **109**, 104919.
- 8 N. Kumaresan , M. Maria Angelin Sinthiya , K. Ramamurthi, R. R. Babu , K. Sethuraman, *Arabian J. Chem.*, 2020, **13**, 3910
9. Y. Cai H.Q. Fan M.M. Xu Q. Li, *Colloid Surface A*, 2013, **36**, 787.
- 10 J.Ahmad, K. Majid, *New J. Chem.*, 2018, **42**, 3246.
